# Supplementary material
Source: ML conference proceedings conference paper supplement (https://openreview.net/forum?id=vSsnEd0Jmou)
Supplement: supplementary_material [file attachment]

# SIMULATING ENVIRONMENTS FOR EVALUATING SCARCE RESOURCE ALLOCATION POLICIES

Anonymous authors

Paper under double-blind review

## ABSTRACT

Consider the sequential decision problem of allocating a limited supply of resources to a pool of potential recipients: This *scarce resource allocation* problem arises in a variety of settings characterized by “hard-to-make” tradeoffs—such as assigning organs to transplant patients, or rationing ventilators in overstretched ICUs. Assisting human judgement in these choices are *dynamic allocation policies* that prescribe how to match available assets to an evolving pool of beneficiaries—such as clinical guidelines that stipulate selection criteria on the basis of recipient and organ attributes. However, while such policies have received increasing attention in recent years, a key challenge lies in *pre-deployment evaluation*: How might allocation policies behave in the real world? In particular, in addition to conventional backtesting, it is crucial that policies be evaluated on a variety of possible scenarios and sensitivities—such as distributions of recipients and organs that may diverge from historic patterns. In this work, we present **AllSim**, an open-source framework for performing data-driven simulation of scarce resource allocation policies for pre-deployment evaluation. Simulation environments are *modular* (i.e. parameterized componentwise), *learnable* (i.e. on historical data), and *customizable* (i.e. to unseen conditions), and —upon interaction with a policy—outputs a dataset of simulated outcomes for analysis and benchmarking. Compared to existing work, we believe this approach takes a step towards more methodical evaluation of scarce resource allocation policies.

## 1 INTRODUCTION

The distribution of organs for transplant is a prototypical example of the *scarce resource allocation* problem - one with salient “life-or-death” consequences that places significant pressure on decision-makers to make implicit but difficult trade-offs. To make the task more manageable, assisting human judgement in these choices are *dynamic allocation policies* that prescribe how to match each available unit of resource to a potential beneficiary. For instance, the United Network for Organ Sharing (UNOS) stipulates policies for organ allocation according to weighted organ- and patient-specific criteria, such as time on the waiting list, severity of illnesses, human leukocyte antigen matching, prognostic information, and other considerations [1–3]. Likewise, in the machine learning community, a variety of data-driven algorithms have been proposed as drop-in dynamic allocation policies, leveraging modern techniques for estimating treatment effects, predicting survival times, and accounting for organ scarcity—and often succeed in demonstrating high degrees of improvement in terms of life expectancies when deployed and evaluated on a backtested basis [4–6].

Is such demonstrated backtested performance sufficiently convincing for practitioners to adopt these developed allocation strategies? In many cases the answer is no, since there is still no standardised way in which this backtesting is actually undertaken [7]. The variety of methods that do exist share common challenges: First, when testing a target policy different from the actual policy used to generate the data, any offline evaluation method is immediately biased away from the true open-loop data-generating process [8]. Second, the evaluation methods themselves impute predicted outcomes, often with simple linear models [9, 10], which are not flexible enough to properly test more flexible machine learning methods. The compounding effect of these limitations leads to clinicians finding the results unconvincing [11], consequently limiting the use of these potentially very beneficial systems.

Historical data is also not the only aspect for which candidate policies should be compared against. In fact, it is crucial that policies be tested on a variety of scenarios and sensitivities for more robust evaluation - based on plausible possible  *futures*  - not just conditions that have been seen before. Real-world conditions may change after all, meaning historical data may no longer be representative of the current environment. To this end, we desire a system that allows us to test policies in such  *counterfactual*  scenarios—thereby more systematically evaluating and benchmarking candidate policies before they are put into practice, as well as continuously updating existing policies based on anticipated or unanticipated changes to the environment. We propose to evaluate policies using machine learning as we illustrate in Figure 1.

As a motivating example, consider the impact of COVID-19 on the availability of organs for transplant - leading in many cases to a sudden and severe drop in supply [12]. Is it possible to reasonably measure performance of allocation policies against such a theoretical event  *a priori* ? Not with current data-based methods that do not contain an example of such an event. Conversely, with our simulated model we can intervene on the distribution of organs - reducing policy roll-out and testing to a simple task.

With this in mind, we wish to highlight that accurate evaluation of such allocation policies is equally, if not more, important than their development. After all, there is little point in developing policies if they cannot be shown to be beneficial and then never used. Worse, it may be that the current evaluation techniques are causing researchers to optimise for performance that may end up being  *actively detrimental*  in real-world deployment. And so, we now continue by considering what exactly an ideal evaluation method may consist of:

**Desiderata** We argue that a good solution should satisfy three key criteria: The environment must be (1)  *modular* , in the sense that it is composed of parameterized components to allow flexible user interaction; (2)  *learnable* , in the sense that it is grounded in the characteristics of real-world data; and (3)  *customizable* , in the sense that it can test policies in previously unseen environment conditions. In particular, performance estimates should be unbiased when target policies different from the data-generating policies are evaluated. Note that our objective is not limited to estimating simple aggregate descriptive statistics (such as mean performance): We may also be interested in evaluating more general impacts of policy deployment—such as whether it inadvertently discriminates based on gender or ethnicity, or whether patients suffering from a particular disease are inadvertently disadvantaged.

**Contributions** In this work, we present  **AllSim**  (Allocation Simulator), a general-purpose open-source framework for performing data-driven simulation of scarce resource allocation policies for pre-deployment evaluation. We use modular environment mechanisms to capture a range of environment conditions (e.g. varying arrival rates, sudden shocks, etc.), and provide for componentwise parameters to be learned from historical data, as well as allowing users to further configure parameters for stress testing and sensitivity analysis. Potential outcomes are evaluated using unbiased causal effects methods: Upon interaction with a policy,  **AllSim**  outputs a batch dataset detailing all of the simulated outcomes, allowing users to draw their own conclusions over the effectiveness of a policy. Compared to existing work, we believe this simulation framework takes a step towards more methodical evaluation of scarce resource allocation policies.

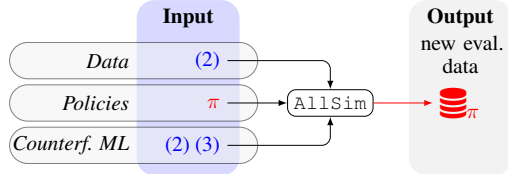

Figure 1: **Conceptual overview of AllSim.** We illustrate  **AllSim** ’s input and how it relates to the desiderata: (2)  *learnable*  and (3)  *customizable* . The first desiderata (modularity) is discussed at length in Sect. 2 where we present  **AllSim** ’s design. The practitioner can use  **AllSim**  to test a policy ( $\pi$ ) and generate a new dataset ( $\pi$ ), used to compute performance metrics of interest.

## 2 SIMULATING ENVIRONMENTS

In this section, we explain various design choices we made when building  **AllSim**  in light of the three criteria we listed under “desiderata” above. Specifically, we require a method for evaluating a policy, not only for the expected outcome (for example recipient life-years), but also with respect to various demographics, aetiologies, resource waste, etc. We will solve this by outputting a synthetic dataset where recipient covariates are matched with organ covariates and an outcome. An example of an excerpt of such a dataset can be found in Appendix A.

## 2.1 PRE-DEPLOYMENT EVALUATION

Let  $X \in \mathbb{R}^d$  denote the feature vector of a *recipient*, and let  $\mathcal{X}(t)$  denote the arrival process of recipients. At each time  $t$ , let  $\mathbf{X}(t) := \{X_i\}_{i=0}^{N(t)} \sim \mathcal{X}(t)$  give the arrival set of (time-varying) size  $N(t)$ . Likewise, let  $R \in \mathbb{R}^e$  be the feature vector of a *resource*, and let  $\mathcal{R}(t)$  be the arrival process of resources. At each time  $t$ , let  $\mathbf{R}(t) := \{R_j\}_{j=0}^{M(t)} \sim \mathcal{R}(t)$  give the arrival set of (time-varying) size  $M(t)$ . While we make no assumptions how recipients are modeled, we assume that resources are immediately *perishable*—that is, each incoming resource cannot be kept idle, and must be consumed by some recipient in the same time step. In organ transplantation, for instance, the time between harvesting an organ and transplanting it (“cold ischemia time”) must be minimized to prevent degradation [13–15].

Let  $Y_+ \in \mathbb{R}$  be the outcome of a *matched* recipient, drawn from the distribution  $\mathcal{Y}(X, R)$  induced by assigning a resource  $R$  to a  $X$ . At each time  $t$ , let  $\mathbf{Y}_+(t) := \{Y_+ \sim \mathcal{Y}(X_R, R) : R \in \mathbf{R}(t)\}$  give the set of outcomes that result from matching each incoming  $R \in \mathbf{R}(t)$  with its assigned  $X_R$ . Likewise, let  $Y_- \in \mathbb{R}$  be the outcome of an *un-matched* recipient, drawn from the distribution  $\mathcal{Y}(X, \emptyset)$ . At each time  $t$ , let the set of outcomes for recipients who are never assigned a resource be given by  $\mathbf{Y}_-(t) := \{Y_- \sim \mathcal{Y}(X, \emptyset) : X \in \mathbf{X}(t), \neg(\exists t' \geq t)(R \in \mathbf{R}(t'), X = X_R)\}$ . (Note that we focus on discrete-time settings (e.g. hours or days), and leave continuous time for future work). Then we have:

**Definition 1 (Scarce Resource Allocation)** Denote an *environment* with the tuple  $\mathcal{E} := (\mathcal{X}, \mathcal{R}, \mathcal{Y})$ . The *scarce resource allocation* problem is to decide which recipients to assign each incoming resource to—that is, to come up with a *dynamic allocation policy*  $\pi : \mathbb{R}^e \times \mathcal{P}(\mathbb{R}^d) \rightarrow \mathbb{R}^d$ , perhaps to optimize some objective defined on the basis of matched/un-matched outcomes. For instance, if  $Y$  is a patient’s post-transplantation survival time, then an objective might be to maximize the average survival time.

**Definition 2 (Pre-Deployment Evaluation)** Let  $f : \prod_k \mathbb{R}^k \times \dots \rightarrow \mathbb{M}$  denote an *evaluation metric* mapping a sequence of outcomes  $\{\mathbf{Y}(t)\}_{t=1, \dots}$  to some space of *evaluation outcome*  $\mathbb{M}$  (e.g. for the average survival time, this would simply be  $\mathbb{R}$ ), where  $\mathbf{Y}(t) := \mathbf{Y}_+(t) \cup \mathbf{Y}_-(t)$ . Given a problem  $\mathcal{E}$  and policy  $\pi$ , the *pre-deployment evaluation* problem is to compute statistics of the distribution  $\mathcal{F}_{\mathcal{E}, \pi}$  of evaluation outcomes  $f(\{\mathbf{Y}(t)\}_{t=1, \dots})$ ; commonly, this would be the mean  $\mathbb{E}_{\mathcal{E}, \pi}[f(\{\mathbf{Y}(t)\}_{t=1, \dots})]$ .

Note that we have defined  $f$  in terms of the *sequence* of per-period outcomes such that it gives maximum flexibility: Depending on how individual outcomes  $Y$  are defined, we can measure point estimates (e.g. the mean survival), compare subpopulations (e.g. whether some types of recipients systematically receive more favorable outcomes), examine trends (e.g. whether outcomes degrade as the types of recipients arriving change), or potentially investigate more complex hypotheses.

## 2.2 SIMULATION COMPONENTS

**Environment Components** Clinically validating a dynamic allocation policy not only requires estimating how that policy performs under a hypothesized scenario  $\mathcal{E}$ , but also how sensitive it is to changing conditions—something that is not possible using existing methods. We believe that the solution lies in *components-based simulation*. By this we mean a simulation that comprises the key components (i.e. *recipient arrival process*  $\mathcal{X}$ , *resource arrival process*  $\mathcal{R}$ , and *outcome generation mechanism*  $\mathcal{Y}$ ), each parameterized in such way so that a practitioner can easily compose the simulation to mimic a scenario of interest. For example, if a practitioner wishes to evaluate an allocation policy against a sudden decline of resources, they need only to alter the component that is responsible for resource provision in the simulated environment. With a components-based simulation, we allow a policy to simply interact with each component. Every interaction (i.e. recipient-resource pairing) is registered in a simulated dataset. Having such a simulated dataset, the practitioner can specify typical clinical evaluation metrics to properly evaluate the policy.

**Policy Responsibilities** A *policy* has two responsibilities: (i) the *policy* maintains the set of recipients in need of a resource (being  $\mathcal{P}(\mathcal{X})$ ), the environment only provides new recipients; and (ii) when the environment provides a new resource, the *policy* is tasked with allocating it to one of the recipients in need. We will denote these two responsibilities as `policy.add( $\mathbf{X}(t)$ )` which allows the *policy* to maintain the arriving recipients for (i), and `policy.select( $\mathbf{R}(t)$ )` which returns a set of recipients (one for each in  $\mathbf{R}(t)$ ) for (ii). Note that while a policy is not part of the environment, it may naturally act differently depending on the characteristics of the environment. For instance, it can even learn how best to behave through interaction.

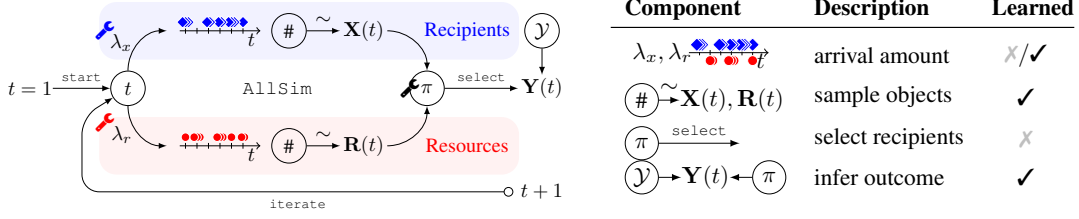

Figure 2: **Simulation life-cycle of AllSim.** In the leftmost part of this figure, we have illustrated the simulation life-cycle. In the rightmost part, we list each component and indicate whether or not they are learned from data. *Simulation life-cycle.* First, we sample the amount of each object arrives on day  $t$ . The expected amount is indicated by  $\lambda_x$  and  $\lambda_r$  for the recipients, and resources, respectively. The expected amount should be interpreted as an arrival rate. Once the amount of objects is specified, they are sampled from a distribution  $\mathbf{X}(t)$  and  $\mathbf{R}(t)$ . Next, each object is presented to the ScRAP, we wish to test, and the ScRAP replies by selecting a set of recipients whom the resources will be presented to. Finally, the simulation evaluates the ScRAP’s decision, by providing an inferred outcome. Wrench icons (⚙️) and an ✗’s in the table indicate which components can be user-specified, others (with ✓) are learned.

**Non-stationary Environments** A major shortcoming in simulations used to evaluate resource allocation policies in medicine, is that they cannot evaluate policies in non-stationary settings. Hence, we model the environment with a time-indicator,  $\mathcal{E}(t)$ . In this subsection, we discuss how we can model a non-stationary environment, while still maintaining a large level of control for the practitioner.

Having sampled a particular recipient or resource, does not influence which is sampled next. However, the probability of sampling a particular recipient, or resource, *does* change with time. For example, the ever more increasing surgical techniques allows clinicians to attempt surgery in more challenging patients, increasing the amount of patients. Similarly for resources, an organ which would not be considered for transplantation 20 years ago, may be considered today. Conversely, the recent COVID-19 pandemic is a shock which has shown an incredible drop in supply [12].

These types of environment changes are modeled through  $t$ . With  $t$ , we can model both slightly changing drifts of supply and demand (such as those that are the consequence of improving surgical techniques), as well as sudden changes (such as those caused by drastic events). We can pair a particular recipient and a resource to a probability  $p(X_i|t)$  and  $p(R_j|t)$  given a time  $t$ , and their respective arrival processes,  $\mathcal{X}(t)$  and  $\mathcal{R}(t)$ . A major point in favour of AllSim, is the ability a practitioner has to model change. Specifically, a practitioner can learn a model of the arrival rate as a function of time and then provide that model to AllSim (as we have in Sect. 5), or the practitioner can provide a self-specified function of the arrival rate, and test the policy in an environment, alternative than the real environment.

### 3 SIMULATION LIFE-CYCLE

Given the components defined in Sect. 2.2, we are now able to formalise the high-level simulation life-cycle. In simple terms, the simulation loop will model the interaction between  $\mathcal{E}$  and the policy for each consecutive day ( $t = 1, 2, \dots$ ) until some pre-specified end ( $T$ ). We have organised this section around Algorithm 1 where we connect each important line with a component in Figure 2 and discuss it in a separate subsection. In Figure 2, where we illustrate the interaction between each component, and clarify which parts of the simulation can be learned, and which parts should be parameterised by the practitioner— solving the second (*learnable*) and third (*customizable*) desiderata, respectively. Having a components-based evaluation strategy solves the first desiderata from our introduction: the simulation is *modular*, i.e. each component can be reimplemented and changed at will.

#### 3.1 (I) Sample recipients and resources

The first step in Algorithm 1 comprises the first and second component in Figure 2, repeated below,

$$\underbrace{\lambda_x, \lambda_r}_{\text{arrival amount}} \quad \underbrace{\# \rightarrow \mathbf{X}(t), \mathbf{R}(t)}_{\text{sample objects}}.$$

Essentially, the goal in ln 4 of alg. 1 is to translate the arrival rates to a set of recipients and resources, trademarked by their features sets. With above formulation, we model the arrival processes as a

---

**Algorithm 1: Main simulation loop.** This simulation life-cycle acts as a section overview for Sect. 3. In our main text we discuss how each line is simulated.

---

**input :** Environment,  $\mathcal{E}$ ; A resource allocation policy denoted as `pol`

**output :** Policy runtime summary

---

```

1 Start,  $t = 0$ ;
2 while simulation runs do
3    $t \leftarrow t + 1$ ;                                /* iterate time */
4    $\mathbf{X}(t), \mathbf{R}(t) \sim \mathcal{E}(t)$ ; /* (i) sample recip.s and resources (Sect. 3.1) */
5   pol.add( $\mathbf{X}(t)$ ); /* (ii) notify policy of recipients (Sect. 3.2) */
6    $\mathbf{X}_{\mathbf{R}(t)} \leftarrow \text{pol.select}(\mathbf{R}(t))$ ; /* (iii) allocate resources (Sect. 3.3) */
7    $\mathbf{Y}_t \sim \mathcal{Y}_{\mathcal{E}}(\mathbf{X}_{\mathbf{R}(t)}, \mathbf{R}(t))$ ; /* (iv) consume resources (Sect. 3.4) */
8 end

```

---

two-step approach: (1) sample the amount of objects we may expect, (2) sample the objects from a distribution. Indicated in Figure 2, only some of these component are learned, and others user-defined.

**Recipients and organs arrive randomly.** The arrival processes  $\mathcal{X}(t)$  and  $\mathcal{R}(t)$  are approximated as,

$$\hat{\mathcal{X}}(t, \theta_x) = \hat{\mathcal{X}}_1(t, \theta_{1,x}) \times \cdots \times \hat{\mathcal{X}}_K(t, \theta_{K,x}), \quad (1)$$

$$\hat{\mathcal{R}}(t, \theta_r) = \hat{\mathcal{R}}_1(t, \theta_{1,r}) \times \cdots \times \hat{\mathcal{R}}_L(t, \theta_{L,r}), \quad (2)$$

where  $\hat{\mathcal{X}}_k$  and  $\hat{\mathcal{R}}_l$  are modeled by a Poisson arrival process with arrival rate  $\lambda_k(t)$  and  $\lambda_l(t)$ , respectively. In Equations (1) and (2) we factorise the arrival processes in  $K$  and  $L$  different sub-arrival processes. Each factor corresponds with some (user-defined) recipient-type (Equation (1)) and resource-type (Equation (2)). Having these factors allows us to model increasing numbers of, for example, older patients entering a transplant wait-list. Arrival rates change with  $t$  and are modeled as,

$$\lambda_k(t) = \nu_k \lambda_k(0) f_k(t), \quad (3)$$

$$\lambda_l(t) = \nu_l \lambda_l(0) f_l(t), \quad (4)$$

with  $\lambda_k(t), \lambda_l(t) \in \mathbb{R}_+$ , and  $\nu_k, \nu_l \in \mathbb{R}_+$  as a normalising constant such that the sum of all  $\lambda_k$  equal some overall arrival rate  $a_x$ , and similarly, the sum of all  $\lambda_l$  equal some overall arrival rate  $a_r$ . Optionally,  $\nu_k$  and  $\nu_l$  can be kept fixed throughout the simulation such that  $a_x$  and  $a_r$  vary as does  $f_{k,l}(t)$ , or it can be recomputed for every step  $t$ , such that  $a_x$  and  $a_r$  are kept fixed throughout the simulation. Lastly,  $f_k$  and  $f_l$  are continuous functions that simulate a user-specified drift. Note that these  $f$  can also be a combination of multiple drift scenarios, or can be shared across different  $k, l$ . Having  $f$ , allows practitioners to very accurately describe the non-stationarity they wish to test for.

As such, we have a set of arrival rates,  $\Lambda_x = [\lambda_1, \dots, \lambda_K]$ , with  $\sum_k \lambda_k = \alpha_x$  with  $\alpha_x \in \mathbb{R}_+$  as the total arrival rate of recipients. The advantage of splitting  $\alpha_x$  into multiple  $\lambda_k$ , is that we can finetune the arrival of certain recipient types, yet allow comparison between  $\alpha_x$  and  $\alpha_r$  (the total arrival rate for resources). For example, the  $k^{\text{th}}$  recipient type may be completely absent when a policy is launched, but over time it gradually enters the system, increasing  $\alpha_x$  as a whole. Naturally, we also model the arrival of resources as we have for recipients, but left it out of discussion for clarity.

**The recipient and resource distributions.** When a recipient or a resource arrives we sample them from a distribution denoted  $p_{\theta_{k,x}}(X)$  for the recipients, and  $p_{\theta_{l,r}}(R)$  for the resources. These distributions are either learnt from data, or shared as an open-source (but privatised) distribution.

Let's say we have a recipient type  $k$  associated with a region in  $\mathcal{X}$ , and an arrival rate parameter  $\lambda_k \in [0, 1)$ . Note that a recipient type's support may overlap with other recipient types, and that each recipient type is modeled by a distribution  $p(X|k)$ . In principle, we wish to keep  $p(X|k)$  fixed, and learnt from data; and  $\lambda_k$  (now acting as an arrival rate conditioned on the type,  $k$ ), tunable.

### 3.2 (II) notify policy of recipients

After the simulation has sampled  $\mathbf{X}(t)$  and  $\mathbf{R}(t)$ , the `policy.add( $\mathbf{X}(t)$ )` function is called. Specifically, this notifies the policy of the arrival of new recipients, which in Figure 2 corresponds to,

$$\mathbf{X}(t), \mathbf{R}(t) \rightarrow (\pi).$$



Note that the above is simply a service provided by the simulation to the policy, and is thus not a learned. The reason for this is, that the organisation of in-need-recipients is entirely up to the policy. For example, more traditional policies may maintain only one priority queue [16], whereas more novel policies may maintain multiple, based on recipient and resource types [6]. As such `AllSim` remains agnostic to the tested policy, resulting in a more general-purpose framework.

### 3.3 (III) allocate resources

Like Sect. 3.2, step (iii) is entirely managed by the tested policy, and in Figure 2 corresponds with,

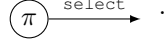

Selecting which recipients that get to consume the resource, is generally what differentiates policies. When a set of recipients is selected (through a `policy.select(R(t))` call in the python interface, `AllSim` retains every piece of information associated with the select-call, which is used to evaluate.

Having the simulation retain all this information, allows `AllSim` to output a dataset of past policy behaviour, much like the original (real-world) dataset we provided to the simulation in order to learn the various components. In essence, with `AllSim` we are able to sample a synthetic dataset of a counterfactual scenario such that we are able to test a policy of interest, *as if it were already in use*.

### 3.4 (IV) consume resources

The final component in `AllSim` is the inference-component, yielding an outcome after a resource was consumed by a recipient. Importantly, this component allows us to evaluate a policy, despite it deviating from the data used to learn the simulation. In Figure 2, this component is illustrated as,

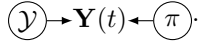

The outcome is a function of the resource and its recipient, making inference hard as some combinations are less observed in the original data. Essentially, the tested policy may make out-of-distribution combinations, as the simulation is learnt from data that was collected under some other policy, illustrated in Figure 3 where two policies,  $\pi$  and  $\pi'$  result in different datasets  $\mathcal{D}$  and  $\mathcal{D}'$ .

**Counterfactual inference.** `AllSim` handles this by using a counterfactual estimator to infer allocation outcomes as they deal with this issue explicitly. Counterfactual methods aim to make an unbiased prediction of the potential outcome, associated with some treatment (or resource). We are interested in counterfactual methods that model the potential outcomes for the recipients when they are/are not allocated a resource. A counterfactual estimator then “completes” the simulated dataset as,

$$\mathbf{Y}(t) = \mathbb{E}[\hat{\mathbf{Y}}(\mathbf{R}(t)) | \mathbf{X}_\pi(t)], \quad (5)$$

where  $\hat{\mathbf{Y}}(\mathbf{R}(t))$  is the estimated potential outcome, using methodology known in the potential outcomes literature, and  $\mathbf{X}_\pi(t)$  are the recipients selected by  $\pi$  at time  $t$ . Equation (5) provides the recipient-resource pair with an estimated outcome, and presents the practitioner with a dataset:

$$\mathcal{D}^\pi := \{(X, R, \hat{Y}(R), t)_i : i = 1, \dots, N\}.$$

$\mathcal{D}^\pi$  allows to easily calculate clinical measures of performance, as we demonstrate in Sect. 5.

## 4 RELATED WORK

We have summarised work related to ours in four major categories: (a) Off-policy learning and evaluation, (b) causal inference, (c) clinical simulations and trials, and (d) simulations for evaluating reinforcement learning (RL) agents. A high-level summary of these areas can be found in Table 1.

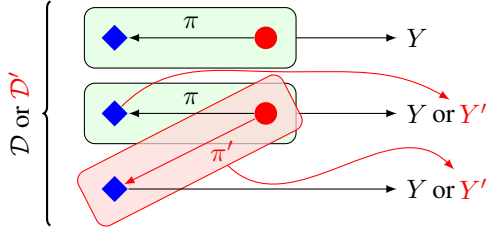

Figure 3: **Effect of a policy on data.** Above illustration, depicts two policies:  $\pi$  and  $\pi'$ . Each policy is tasked with assigning organs (●) to recipients (◆). Besides recipients and organs, we observe an outcome,  $Y$ . Despite observing the same recipients and organs, a different policy results in completely different outcomes.

Table 1: **Overview of related work.** We categorise our related work in four categories: off-policy learning, causal inference, clinical simulations, simulations for evaluating reinforcement learning agents. For each category we provide the most prominent method of calculating policy performance, and whether the categories take into account four major questions: (i) is the method tunable to new settings?; (ii) can we evaluate using data?; (iii) are the performance estimates unbiased?; and (iv) can we evaluate beyond simple aggregate descriptive statistics?

|                        | Citations   | Perf. calculation                                                            | (i) | (ii) | (iii) | (iv) |
|------------------------|-------------|------------------------------------------------------------------------------|-----|------|-------|------|
| Off-policy learning    | [17–22]     | $\frac{p_{\pi'}(R X)}{p_{\pi}(R X)}Y \sim \mathcal{D}^{\pi}$                 | ✗   | ✓    | ✓     | ✗    |
| Causal inference       | [23–26]     | $p(R X)^{-1}Y \sim \mathcal{D}^{\pi}$                                        | ✗   | ✓    | ✓     | ✗    |
| Clinical simulations   | [16, 27–30] | $\mathbb{E}_{\mathcal{D}^{\pi}}[Y X]$                                        | ✗   | ✓    | ✗     | ✓    |
| Reinforcement learning | [31–37]     | $\mathbb{E}_{\text{sim}}[v(Y) X, R]$                                         | ✓   | ✗    | ✓     | ✓    |
| AllSim                 | (ours)      | $\mathbb{E}_{\mathcal{D}^{\pi'} \sim \mathcal{X}' \times \mathcal{R}'}[Y X]$ | ✓   | ✓    | ✓     | ✓    |

**(a) Off-policy evaluation and (b) causal inference.** Data are collected under some active scarce resource allocation policy (ScRAP), which determines how resources are paired with recipients, which in turn determine the outcomes we get to observe. Clearly, our setting is connected to off-policy evaluation, as we wish to evaluate a policy (ScRAP) that is different from the policy that collected the available data. Figure 3 illustrates different matches (depicted as  $\blacklozenge \leftarrow \bullet$ ) made across different policies resulting in different outcomes:  $Y$  or  $Y'$ , and datasets,  $\mathcal{D}$  and  $\mathcal{D}'$ . The difficulty of this situation, is that we observe either  $\mathcal{D}$  or  $\mathcal{D}'$ , *not both*, relating to the potential outcomes setup [38–40]. Using  $\mathcal{D}$  to evaluate  $\pi$  simply means calculating some descriptive statistics. In contrast, evaluating  $\pi'$  on  $\mathcal{D}$  is much more involved, as the same statistics would yield a biased estimate.

One way to calculate, for example the average  $Y' \sim \mathcal{D}$ , is to weigh each sample:  $g(\blacklozenge, \bullet)Y \sim \mathcal{D}$ . In the literature on off-policy evaluation (and learning), this is known as *importance sampling*, where each sample is weighted according to the likelihood of it belonging in  $\mathcal{D}'$ . Interestingly, the exact same strategy is also widely known in counterfactual learning and causal inference, under the name *inverse propensity weighting* (IPW) [19]. The key difference between both, is the target distribution. Where importance sampling transforms the estimate from one policy’s distribution, to another; IPW transforms from a policy’s distribution, to an unbiased estimate (i.e. to a  $\frac{1}{N}$  weighting for averages).

Shown in Table 1, neither IPW nor importance sampling, provide a solution to evaluating scarce resource allocation policies. One reason for this is that the outcome is a (weighted) estimate of only one aggregate descriptive statistic (for example, expected outcome or reward). When we want additional estimates, one requires a different weighting scheme [22]. Furthermore, when we wish to test a policy in a different environment, where for example the recipients’ or resources’ distributions change, evaluating a policy becomes increasingly more difficult if one wishes to rely on IPW or importance sampling due to the increased differences in likelihood density. Furthermore, evaluation goes much beyond aggregate statistics, as we may be interested in, for example, demographic differences between recipients and non-recipients (Appendix A includes an example using AllSim).

**(c) Clinical evaluation and trials.** A naive method to evaluating these policies, is to model  $Y'$  using simple (linear [16]) regression. Any combination  $\blacklozenge \leftarrow^{\pi'} \bullet$ , through a new policy,  $\pi'$  has an estimated outcome  $\hat{Y}'$  using a regression model, trained on  $\mathcal{D}$ . Herein lies the problem: the regression model is still biased to  $\pi$ . In particular,  $\mathcal{D}$  simply does not contain pairs that  $\pi'$  would make, and therefore has trouble estimating  $Y'$ . By using causal methodology (Sect. 3.4), this is one key area where AllSim improves upon contemporary clinical simulations [9, 16, 41, 42], as these only “replay” the past without the possibility of changing the environment characteristics nor allow counterfactual inference.

Clinicians do have another way to account for this: clinical trials [27, 28]. Clinical trials estimate a causal estimand, which could then be used to “complete” the dataset as a naive regression model would above. However, two problems arise: setting up a clinical trial can sometimes be considered unethical (especially when dealing with scarce resources, and more specific research questions) [43], or clinical trials may suffer from compliance issues which will still result in biased outcomes [44, 45].

**(d) Simulations for evaluating RL agents.** A final set of solutions is that of simulations in which an RL agent can act and learn. Naturally, there are differences between policies for RL and scarce resource allocation, such as the importance of future reward which implies correlated consecutive states, and a fixed action space. However, there are also similarities, such as the definition of a policy (being a set of rules which take into account a context or state), and the online nature of the problem.

Literature on RL is blessed with some of the most well-known and actively maintained libraries for evaluating a wide range of RL algorithms [31, 32, 37]. However, other than being inapplicable in our

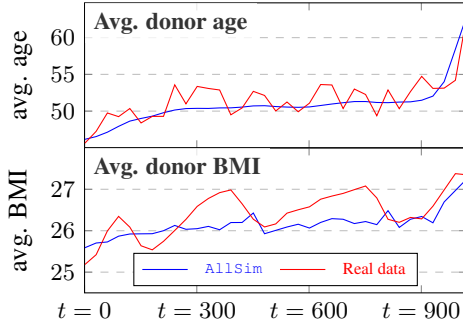

(a) Mean arrival of age and BMI..

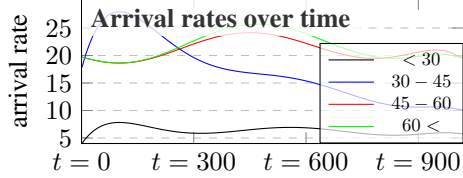(b) Depicted are the arrival rates for each age bracket. Note that, in this instance, we learnt these from data, but one can use *any* function.

```

1 import allsim as asim
2
3 bins = [30, 45, 60]
4 f = lambda age: np.digitize(
5     age, bins=bins).item()
6
7 condition = asim.infer.Condition(
8     labels=["AGE"], function=f,
9     options=4)
10
11 kde = asim.KDEDensity(
12     condition=condition)
13 kde.fit(R) # R: res. pd.DataFrame
14
15 system = {
16     0: asim.PoissonProcess(
17         update_lam=regressors[0]),
18     1: ...
19 }
20 poisson_system = asim.PoissonSystem(
21     density=kde, system=system,
22     alpha=alpha, normalize=True)
23
24 stream = DataFrame(
25     columns=[*R_columns, "t"])
26 for t in T:
27     sample = poisson_system(t)
28     stream = stream.append(sample)

```

Figure 4: AllSim **can generate realistic synthetic data**. Using data on donor organs, we let AllSim model 3 years of organ arrivals and compare it with the actual arrival as reported in the data. In Figures 4a and 4b we show AllSim’s output (in donor age and BMI), given the code on the right. With minimal code, a simple condition (4 age brackets), and conservative models (polynomial regression to fit the arrival rates, and a Gaussian kernel density to model the organ densities), we find AllSim to accurately model the actual arrival of organs.

setting (for the reasons included above), they also have one other major downside: *they do not learn from data*. While these simulations model some very interesting environments, each aspect of the simulation is hard-coded. In order to evaluate a policy that is to be deployed in a real-world setting, we have to test it to the specifics of the environment of interest; to be defined by the practitioners developing the policy. In fact, we consider this a major reason for developing and using AllSim.

AllSim marks a significant advance over the current state-of-the-art: currently *no evaluation technique* allows a practitioner to *change the behaviour of the evaluation environment*, despite the fact that the actual environment most certainly will change in the future; nor do contemporary evaluation techniques account for potential bias from previous policies, resulting in poor performance estimates.

## 5 SIMULATION INTERFACE & EXAMPLES

Given the formal definition of AllSim in Sects. 2 and 3, we now introduce AllSim’s interface and use it directly to provide some experimental results. We split this section in two major parts: first, we discuss how we model arrival processes and resource densities (Sect. 5.1); and then, we discuss how we can combine these arrival processes in the broader simulation interface, together with a counterfactual outcome model (Sect. 5.2). Both parts provide some empirical validation of AllSim<sup>1</sup>.

### 5.1 ARRIVAL PROCESSES AND RESOURCE DENSITIES

As is indicated in Figure 2 and Sect. 2.2, sampling new resources and recipients is a two-step process. On a daily basis (or some other discrete time interval in  $[t]$ ), we first determine how many resources or recipients we need to sample, and then we sample them. The former is modeled through a Poisson arrival rate that changes over time, and the second is sampled from some learnt density. Of course, a user can implement their own arrival process by inheriting from the abstract `ArrivalProcess` class. Importantly, we need to be able to condition both on some pre-specified characteristic of the object of interest. For example, one may be interested in modeling the arrival of harvested organs of older patients distinctly from younger patients. An example of this is provided in Figure 4, where we show the changing resources coming in the system, alongside the code that generated the result.

<sup>1</sup>Note that AllSim is the first method of this kind for benchmarking scarce resource allocation policies.



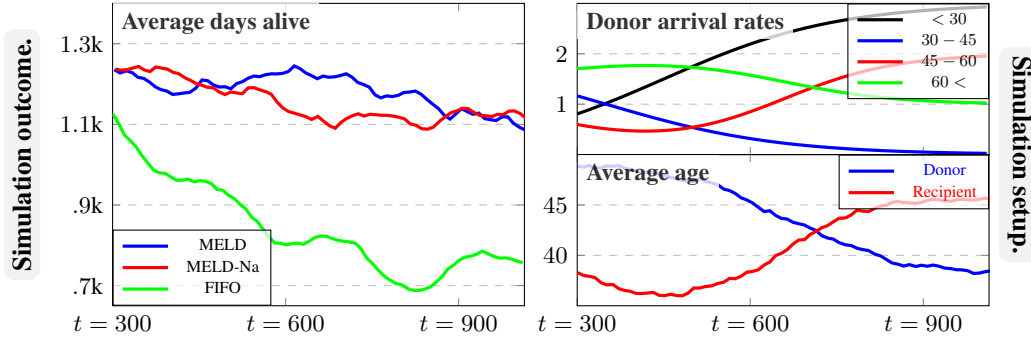

Figure 5: **Simulated outcomes.** AllSim can be used to compare policies in a user-specified scenario. Above we compare three different organ allocation policies: MELD, MELD-na, and FIFO. The MELD policies are clinically validated and used in practice, while FIFO is a naive first-in first-out allocation policy (which should not work at all!). When comparing these policies, our AllSim simulation suggests that the clinically validated policies do outperform a naive FIFO policy in terms of average survival (left), as is expected. Furthermore, the performance of each policy does seem to drop slightly over time. This too is expected as we tested the policies in a setup with increased recipient age over time (right). The reported averages are windowed over 300 samples.

**Object densities.** Before discussing a temporal arrival rate, we first discuss modeling the object’s densities. Consider `lns 3–12` in the righthand side of Figure 4. Using this code, we first define what we want to condition on, using a `Condition` object: in this case we formulate age brackets. With the `KDEDensity` class, which is a subclass of the abstract `Density` class, we can automatically model a density, conditioned on these age brackets. Each `Density` object implements a `fit` and `sample` function, which is used to sample new objects by the `System`, which we discuss next.

**Arrival processes.** Using a `Density`, we move on to `lns 14–26`, where we first build a system of multiple arrival processes, one for each discrete condition as in Equations (1) and (2). In particular, we define a `PoissonProcess` for each condition (or age bracket), which is then provided to a `PoissonSystem`. Using the `PoissonSystem`, we can sample the arriving objects for each  $t$  in `ln 25`. Note that we also model  $\alpha$ , returning the overall arrival rate, such that the system can calculate an appropriate  $\nu$ . Figure 4a shows that AllSim accurately models the arriving objects.

## 5.2 COUNTERFACTUAL OUTCOMES AND SIMULATION

With the arrival processes coded above together with a counterfactual `Inference` object compose a `Simulation` object—the main interaction interface. In particular, one defines a set of arrival rates (such as in Figure 4b) for both recipients and resources (cfr. `ln 13–17`) to create a simulation:

```
simulation = asim.Sim(resource_process, patient_process, inference)
```

With that simulation, a practitioner can instantiate a `Policy`, which implements the `add` and `select` methods. For example, we have implemented the MELD policy [46], which is a widely known and used ScRAP for liver allocation. Using the `simulation`, we can generate a simulated dataset:

```
df = simulation.simulate(meld_policy, T=T)
```

Where `df` is a `Pandas DataFrame` [47, 48]. Naturally, `df` contains an enormous amount of information w.r.t. the policy’s allocations in our environment. As such, we have included only a subset of the potential results in Figure 5. Additional results and details can be found in Appendix A. Of course, it is up to the practitioner to determine appropriate analysis, settings, and performance metrics.

## 6 CONCLUSION

AllSim allows standardised evaluation of resource allocation policies. While our main text heavily focuses on organ-transplantation for the sake of exhibition, Appendix E illustrates AllSim for COVID-19, an example outside organ-transplantation. We believe strongly that AllSim’s generality and modularity allows for sensible adoption in a wide range of application areas. Furthermore, having standardised evaluation will encourage research in this very important and impactful domain. Naturally, conducting research in clinical resource allocation *requires* consideration of a policy’s societal impact. While we believe AllSim will aid in this respect also (by offering more than simple aggregate statistics), in Appendix D we provide a section on this topic specifically.

**Ethics Statement.** We envisage **A11Sim** as a tool to *help* accurate and standardised evaluation of organ allocation policies, however emphasise that any finding would need to be further verified by a human expert or by a clinical trial. Ultimately, the decision on whether or not to trust a decision making tool is up to the acting clinician and hospital board. We hope that **A11Sim** can help in any way to facilitate that decision, but stress that suggestions or evaluation always require critical assessment, as is the case for any research. We also refer the reader to Appendix D for a more thorough discussion on the potential societal impact of systems such as **A11Sim**.

**Reproducibility Statement.** To ensure reproducibility, we have included all our code to reproduce the presented results. Furthermore, we have included a detailed discussion on how to use our simulation in Appendices B and C

## REFERENCES

- [1] Dale G Renlund, David O Taylor, Abdallah G Kfoury, and Robert S Shaddy. New unos rules: historical background and implications for transplantation management. *The Journal of heart and lung transplantation*, 18(11):1065–1070, 1999.
- [2] Thomas M Egan and Robert M Kotloff. Pro/con debate: lung allocation should be based on medical urgency and transplant survival and not on waiting time. *Chest*, 128(1):407–415, 2005.
- [3] Leslie P Scheunemann and Douglas B White. The ethics and reality of rationing in medicine. *Chest*, 140(6):1625–1632, 2011.
- [4] Jinsung Yoon, Ahmed Alaa, Martin Cadeiras, and Mihaela Van Der Schaar. Personalized donor-recipient matching for organ transplantation. In *Proceedings of the AAAI Conference on Artificial Intelligence*, volume 31, 2017.
- [5] Jeroen Berrevoets, James Jordon, Ioana Bica, Alexander Gimson, and Mihaela van der Schaar. OrganITE: Optimal transplant donor organ offering using an individual treatment effect. In *Advances in Neural Information Processing Systems*, volume 33, pages 20037–20050. Curran Associates, Inc., 2020.
- [6] Jeroen Berrevoets, Ahmed Alaa, Zhaozhi Qian, James Jordon, Alexander ES Gimson, and Mihaela Van Der Schaar. Learning queueing policies for organ transplantation allocation using interpretable counterfactual survival analysis. In *International Conference on Machine Learning*, pages 792–802. PMLR, 2021.
- [7] Srikant Devaraj, Sushil K Sharma, Dyan J Fausto, Sara Viernes, Hadi Kharrazi, et al. Barriers and facilitators to clinical decision support systems adoption: A systematic review. *Journal of Business Administration Research*, 3(2):36, 2014.
- [8] Philip Thomas and Emma Brunskill. Data-efficient off-policy policy evaluation for reinforcement learning. In *International Conference on Machine Learning*, pages 2139–2148. PMLR, 2016.
- [9] Vikram Kilambi, Kevin Bui, and Sanjay Mehrotra. Livsim: an open-source simulation software platform for community research and development for liver allocation policies. *Transplantation*, 102(2), 2018.
- [10] David Thompson, Larry Waisanen, Robert Wolfe, Robert M Merion, Keith McCullough, and Ann Rodgers. Simulating the allocation of organs for transplantation. *Health care management science*, 7(4):331–338, 2004.
- [11] John PA Ioannidis. Why most published research findings are false. *PLoS medicine*, 2(8):e124, 2005.
- [12] C Ahn, H Amer, D Anglicheau, N Ascher, C Baan, B Bat-Iredui, Thierry Berney, MGH Betjes, S Bichu, H Birn, et al. Global transplantation covid report march 2020. *Transplantation*, 2020.
- [13] Agnes Debout, Yohann Foucher, Katy Trébern-Launay, Christophe Legendre, Henri Kreis, Georges Mourad, Valérie Garrigue, Emmanuel Morelon, Fanny Buron, Lionel Rostaing, et al. Each additional hour of cold ischemia time significantly increases the risk of graft failure and mortality following renal transplantation. *Kidney international*, 87(2):343–349, 2015.
- [14] J Adam van der Vliet and Michiel C Warlé. The need to reduce cold ischemia time in kidney transplantation. *Current opinion in organ transplantation*, 18(2):174–178, 2013.

- [15] James E Stahl, Jennifer E Kreke, Fawaz Ali Abdul Malek, Andrew J Schaefer, and Joseph Vacanti. Consequences of cold-ischemia time on primary nonfunction and patient and graft survival in liver transplantation: a meta-analysis. *PLoS one*, 3(6):e2468, 2008.
- [16] James Neuberger, Alex Gimson, Mervyn Davies, Murat Akyol, John O’Grady, Andrew Burroughs, Mark Hudson, UK Blood, et al. Selection of patients for liver transplantation and allocation of donated livers in the uk. *Gut*, 57(2):252–257, 2008.
- [17] Doina Precup. Eligibility traces for off-policy policy evaluation. *Computer Science Department Faculty Publication Series*, page 80, 2000.
- [18] Philip S Thomas. *Safe reinforcement learning*. PhD thesis, University of Massachusetts Libraries, 2015.
- [19] Miroslav Dudík, John Langford, and Lihong Li. Doubly robust policy evaluation and learning. *arXiv preprint arXiv:1103.4601*, 2011.
- [20] John Hammersley. *Monte carlo methods*. Springer Science & Business Media, 2013.
- [21] Michael JD Powell and J Swann. Weighted uniform sampling—a monte carlo technique for reducing variance. *IMA Journal of Applied Mathematics*, 2(3):228–236, 1966.
- [22] Yash Chandak, Scott Niekum, Bruno Castro da Silva, Erik Learned-Miller, Emma Brunskill, and Philip S Thomas. Universal off-policy evaluation. *arXiv preprint arXiv:2104.12820*, 2021.
- [23] Keisuke Hirano, Guido W Imbens, and Geert Ridder. Efficient estimation of average treatment effects using the estimated propensity score. *Econometrica*, 71(4):1161–1189, 2003.
- [24] Donald B Rubin. Estimating causal effects from large data sets using propensity scores. *Annals of internal medicine*, 127(8.Part 2):757–763, 1997.
- [25] Guido W Imbens and Donald B Rubin. *Causal inference in statistics, social, and biomedical sciences*. Cambridge University Press, 2015.
- [26] Guido W Imbens and Donald B Rubin. Rubin causal model. In *Microeconometrics*, pages 229–241. Springer, 2010.
- [27] Steven Piantadosi. *Clinical trials: a methodologic perspective*. John Wiley & Sons, 2017.
- [28] Stuart J Pocock. *Clinical trials: a practical approach*. John Wiley & Sons, 2013.
- [29] Lawrence M Friedman, Curt D Furberg, David L DeMets, David M Reboussin, and Christopher B Granger. *Fundamentals of clinical trials*. Springer, 2015.
- [30] Rebecca DerSimonian and Nan Laird. Meta-analysis in clinical trials. *Controlled clinical trials*, 7(3):177–188, 1986.
- [31] Greg Brockman, Vicki Cheung, Ludwig Pettersson, Jonas Schneider, John Schulman, Jie Tang, and Wojciech Zaremba. Openai gym, 2016.
- [32] Emanuel Todorov, Tom Erez, and Yuval Tassa. Mujoco: A physics engine for model-based control. In *2012 IEEE/RSJ International Conference on Intelligent Robots and Systems*, pages 5026–5033. IEEE, 2012.
- [33] Joel Z. Leibo, Edgar Dué nez Guzmán, Alexander Sasha Vezhnevets, John P. Agapiou, Peter Sunehag, Raphael Koster, Jayd Matyas, Charles Beattie, Igor Mordatch, and Thore Graepel. Scalable evaluation of multi-agent reinforcement learning with melting pot. In *International Conference on Machine Learning*, pages 6187–6199. PMLR, 2021.
- [34] Charles Beattie, Thomas Köppe, Edgar A Duéñez-Guzmán, and Joel Z Leibo. Deepmind lab2d. *arXiv preprint arXiv:2011.07027*, 2020.
- [35] Oriol Vinyals, Timo Ewalds, Sergey Bartunov, Petko Georgiev, Alexander Sasha Vezhnevets, Michelle Yeo, Alireza Makhzani, Heinrich Küttler, John Agapiou, Julian Schrittwieser, et al. Starcraft ii: A new challenge for reinforcement learning. *arXiv preprint arXiv:1708.04782*, 2017.
- [36] Charles Beattie, Joel Z Leibo, Denis Teplyashin, Tom Ward, Marcus Wainwright, Heinrich Küttler, Andrew Lefrancq, Simon Green, Víctor Valdés, Amir Sadik, et al. Deepmind lab. *arXiv preprint arXiv:1612.03801*, 2016.
- [37] Tom Stepleton. The pycolab game engine, 2017.

- [38] Jersey Neyman. Sur les applications de la théorie des probabilités aux expériences agricoles: Essai des principes. *Roczniki Nauk Rolniczych*, 10:1–51, 1923.
- [39] Donald B Rubin. Estimating causal effects of treatments in randomized and nonrandomized studies. *Journal of educational Psychology*, 66(5):688, 1974.
- [40] Paul W Holland. Statistics and causal inference. *Journal of the American statistical Association*, 81(396):945–960, 1986.
- [41] Mohd Shoaib, Utkarsh Prabhakar, Sumit Mahlawat, and Varun Ramamohan. A discrete-event simulation model of the kidney transplantation system in rajasthan, india. *Health Systems*, 11(1):30–47, 2022.
- [42] Shoaib Mohd, Navonil Mustafee, Karan Madan, and Varun Ramamohan. Leveraging healthcare facility network simulations for capacity planning and facility location in a pandemic. *Available at SSRN 3794811*, 2021.
- [43] Cecilia Nardini. The ethics of clinical trials. *Ecancermedicalscience*, 8, 2014.
- [44] Jack Cuzick, Robert Edwards, and Nereo Segnan. Adjusting for non-compliance and contamination in randomized clinical trials. *Statistics in medicine*, 16(9):1017–1029, 1997.
- [45] David Maxwell Chickering and Judea Pearl. A clinician’s tool for analyzing non-compliance. In *Proceedings of the National Conference on Artificial Intelligence*, pages 1269–1276, 1996.
- [46] Patrick S Kamath, Russell H Wiesner, Michael Malinchoc, Walter Kremers, Terry M Therneau, Catherine L Kosberg, Gennaro D’Amico, E Rolland Dickson, and W Ray Kim. A model to predict survival in patients with end-stage liver disease. *Hepatology*, 33(2):464–470, 2001.
- [47] Wes McKinney. Data Structures for Statistical Computing in Python. In Stéfan van der Walt and Jarrod Millman, editors, *Proceedings of the 9th Python in Science Conference*, pages 56 – 61, 2010.
- [48] The pandas development team. pandas-dev/pandas: Pandas, February 2020.
- [49] Alicia Curth and Mihaela van der Schaar. Nonparametric estimation of heterogeneous treatment effects: From theory to learning algorithms. In *International Conference on Artificial Intelligence and Statistics*, pages 1810–1818. PMLR, 2021.
- [50] Sören R Künnel, Jasjeet S Sekhon, Peter J Bickel, and Bin Yu. Metalearners for estimating heterogeneous treatment effects using machine learning. *Proceedings of the national academy of sciences*, 116(10):4156–4165, 2019.
- [51] Ioana Bica, James Jordon, and Mihaela van der Schaar. Estimating the effects of continuous-valued interventions using generative adversarial networks. *Advances in Neural Information Processing Systems*, 33:16434–16445, 2020.
- [52] Xinkun Nie and Stefan Wager. Quasi-oracle estimation of heterogeneous treatment effects. *Biometrika*, 108(2):299–319, 2021.
- [53] Edward H Kennedy. Optimal doubly robust estimation of heterogeneous causal effects. *arXiv preprint arXiv:2004.14497*, 2020.
- [54] Scott Powers, Junyang Qian, Kenneth Jung, Alejandro Schuler, Nigam H Shah, Trevor Hastie, and Robert Tibshirani. Some methods for heterogeneous treatment effect estimation in high dimensions. *Statistics in medicine*, 37(11):1767–1787, 2018.

## A EXTENDED RESULTS

### A.1 RUNNING A SIMULATION

**A simple example.** Consider Figure 6 where we ran the MELD-Na policy in two hypothetical scenarios: one where COVID-19 happens, and one where it doesn't. With **AllSim** we can model each scenario confidently. For this particular example, we fix the seed of **AllSim** and only change the supply of organs by giving two different resource arrival processes:

```

1 def covid(t):
2     if t < 600:
3         return .5
4     else:
5         return .25
6
7 def no_covid(t):
8     return .5

```

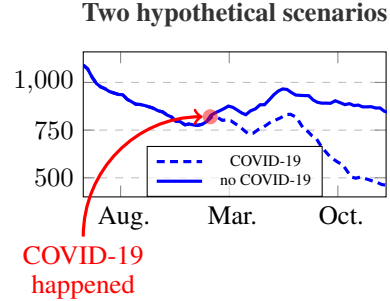

Figure 6: **Two hypothetical scenarios.** We require to evaluate a policy (e.g. MELD-Na) in hypothetical (contradictory) scenarios.

**Tuning the simulation.** Running and composing a simulation, is as simple as defining how we wish to let the supply of resources and recipients evolve in  $t$ . Such evolution is expressed as a changing arrival rate (crf. Equations (3) and (4)). In particular, one only needs to define  $\lambda_{x,r}$ , normalisation is handled by **AllSim**. However, even there **AllSim** offers detailed specification possibilities. Like  $\lambda_{x,r}$ , we can specify a custom function for  $\alpha_{x,r}$  also. Normalisation, will then respect the value of  $\alpha$  at time  $t$ . For example, if we wish the total arrival rate of all resources to remain constant at 5, we simply set  $\alpha_r$  to a constant function:

```

1 alpha_r = lambda t: 5

```

This way, no matter how complicated our functions for  $\lambda_r$ , are, we know that the total arrival rate, across all conditioned distributions for the resources, we remain fixed at 5.

**Inference.** One additional component to **AllSim**, is its **Inference** module. In our simulations, we relied on OrganITE [5], where we adopted the original source-code provided by the authors, to our **Inference** module. Having a causal model, allows to have unbiased estimates for the resource to recipient pairing’s outcome (column “Y” in Table 2).

Building a custom **Inference** object, is as simple as inheriting from **Inference**, which requires the user to implement the `infer(x: np.ndarray, r: np.ndarray) -> Any` function.

### A.2 ANALYSING AllSim’S OUTPUT.

Running `df = simulation.simulate(policy, T=T)` yields a **DataFrame** object, containing each match made by the `policy`, in the environment simulated by the `ss.Simulation` object. Consider Table 2 for an excerpt of the output for which we provided some aggregate results in Figure 5. Table 2 is exactly the type of data one may expect when learning about a policy, or even learning a new (ML-driven) policy [5].

Given the output of our simulation, we can see each variable, both donor as well as recipient progress over time. For example, one may be interested how each gender evolves w.r.t. allocations, with the changing supply of resources (as in Figure 5). Naturally, this is but one example of what one can achieve in terms of analysis on MELD (or any other policy), using **AllSim**. As such, we encourage the reader to browse through the provided code, in order to get a sense of what the possibilities really are when using **AllSim**.

## B DETAILS ON AllSim

While all source code is provided in our submission, we provide some additional detail on **AllSim**’s functionality, structure, and future goals.



Table 2: **Example output.** When donor covariates are NaN, we know a patient died on the wait list, as they did not receive a donor organ. Note that, we only display some covariates, we have included code in our submission, should the interested reader want to inspect the complete `DataFrame`.

| Donor covariates |         | Recipient covariates |        |            |        |        |     |
|------------------|---------|----------------------|--------|------------|--------|--------|-----|
| Age              | BMI     | INR                  | Sodium | Creatinine | Gender | Y      | Day |
| 28.1628          | 27.7080 | 4.8144               | 138.10 | 11.351     | M      | 1792.9 | 1   |
| NaN              | NaN     | 0.5663               | 137.71 | 0.4535     | F      | 5.0    | 7   |
| NaN              | NaN     | 6.694                | 135.63 | 1.7323     | F      | 24.948 | 26  |
| 34.893           | 21.852  | 3.8375               | 134.15 | 7.9500     | M      | 257.79 | 1   |
| ...              |         |                      |        |            |        |        |     |

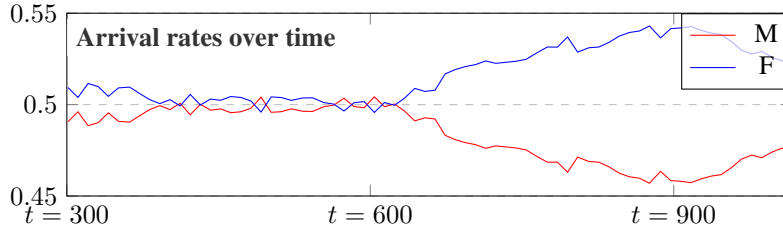

Figure 7: **Recipient-gender in function of time.** Given the MELD policy, and the changing supply of resources (cfr. Figure 5, we find that the recipient-gender changes slightly. Note that, this type of analysis is easily done given `AllSim`, as we can easily run analysis on the provided `DataFrame` object, returned by our simulation.

### B.1 NEAT FUNCTIONALITY

**One-hot encoded variables.** In heterogeneous data, one may expect a mixture of continuous and categorical variables. Good practice to handle categorical variables, is to one-hot encode them into columns of ones and zeroes, for each category. Most density estimation methods, do not automatically sample these mixtures of continuous and categorical data. Despite its performance and simplicity, a standard Kernel Density estimator, like the one we use in our simulation, cannot handle these data out-of-the-box. However, our implementation *does*. One only needs to provide the specific groups of columns which compose the categorical variables.

For example, the gender column for the recipient may be one-hot encoded into: "GENDER\_0" and "GENDER\_1". When fitting our `KDEDensity`, we simply provide these columns to the `one_hot_encoded=[["GENDER_0", "GENDER_1"]]` parameter, and the `KDEDensity` automatically transforms these columns, in such a way that only one of them (being the one with maximum probability), is translated into 1.

**Auto-scaling.** Dealing with a normalised arrival rate can be tricky to determine up front. As such, `AllSim` does this automatically. By solely providing an `alpha: Callable[[int], float]`, `AllSim's PoissonSystem` objects will normalise any output that the `System's PoissonProcesses` may have. Naturally, normalisation will depend on the chosen process, and as such does not propagate up to the general `System` nor `Process`. If, for example, one wishes to implement an alternative point process (not a Poisson process), normalisation may look differently.

**Automatic conditioning.** Another nice functionality provided in `AllSim` is automatic conditioning, in case no `Condition` is provided. A `Density` does this, by first clustering the data (from which it will later learn its density), into `K` clusters. Naturally, one will have to provide the amount of clusters before the `Density` is able to automatically condition. Having these separate clusters, still allows defining arrival rates and processes for each cluster center, i.e. `K` must match the amount of `Processes` are provided to the `System`.

### B.2 PACKAGE STRUCTURE

The `AllSim` package structure us as follows:

```

1 |_ src
2   |_ infer.py
3   |_ sim.py
4   |_ outcome
5     |_ counterfactual_inference.py
6     |_ counterfactual_models.py
7   |_ policies
8     |_ base.py
9     |_ policy.py

```

The two main components are in `infer.py` and `sim.py`, where `infer.py` contains everything related to `Density`, `Process`, and their subclasses; and `sim.py` concerns the `Simulation` class.

In `outcome` and `policy`, we provide basic implementations of some well known policies and counterfactual models. Note that these are actually non-essential to `AllSim`, as they can be completely user-defined, as long as they respect the `Inference` and `Policy` abstract classes, provided in the respective folders.

**Inheritance.** The base classes (`Density`, `Policy`, and `Inference`) can all be implemented by the user. Consider following class structures:

```

1  class Density:
2      def __init__(self
3          condition: Condition, # see below for more details
4          K: int=1,
5          drop: np.ndarray=np.ndarray(['condition'])):
6          ...
7
8      @abstractmethod
9      def sample(self, n: int=1) -> np.ndarray:
10         ...
11
12     @abstractmethod
13     def fit(self, D: pd.DataFrame) -> None:
14         ...
15
16  class Policy:
17      def __init__(self,
18          self,
19          name: str,
20          initial_waitlist: np.ndarray,
21          dm: OrganDataModule): # a standardised datamodule should the
22  policy want to learn from data
23         ...
24
25      @abstractmethod:
26      def select(self, resources: np.ndarray) -> Tuple[np.ndarray, np.
27  ndarray]:
28          # returns recipients and resources, matched
29          ...
30
31      @abstractmethod
32      def add(self, x: np.ndarray) -> None:
33          # allows policy to add recipients to internal waitlist (if
34  needed)
35          ...
36
37      @abstractmethod
38      def remove(self, x: np.ndarray) -> None:
39          # allows policy to remove recipients, when for example they
40  die
41          ...
42
43  class Inference
44      def __init__(self,

```

```

41         model: Any,          # the Inference class acts as a wrapper for
any model type
42         mean: float=0,      # mean and std are necessary to scale the
outcomes, assuming
43         std: float=1):      # standard scaling
44         ...
45
46         def __call__(self, x: np.ndarray, r: np.ndarray, *args: Any, **
kwargs: Any) ->Any:
47             return self.infer(x, r, *args, **kwargs)
48
49         @abstractmethod
50         def infer(self, x: np.ndarray, r: np.ndarray, *args: Any, **
kwargs: Any) -> Any:
51             ...

```

The Condition class then, wraps a function from a set of labels in the dataset, to a numerical value. One may choose to combine multiple variables, or just one, as we have with the "AGE" variable in Figures 4 and 5. Please find an example initialisation in Figure 4. While one *can* inherit from the Condition class, we would advice to implement a custom function (as the lambda function we had), and provide it to the Condition object.

**Future goals & open-source** Our goal is for AllSim to be a benchmarking standard when evaluating ScRAPs. An important milestone for this, is to completely open-source our simulation. Doing so, allows other researchers to scrutinise, enhance, and discuss how we should move beyond what we can do today. Below, we provide two points we believe our community should discuss.

## C USING AllSim

Here we provide the basic code, that will generate Figure 5. Naturally, the complete code is provided in the supplemental materials.

```

1  # load data
2  X, R, Y = custom_load_function(data)
3  organite = load_organite_model(location) # should load an implemented
Inference object
4
5  # DENSITY LEARNING
6  # RESOURCES
7  bins_r = [30, 45, 60]
8  def condition_function_r(age):
9      return np.digitize(age, bins=bins_r).item()
10
11
12  condition_r = infer.Condition(
13      labels=['AGE'],
14      function=condition_function_r,
15      options=len(bins_r) + 1
16  )
17
18  kde_r = infer.KDEDensity(condition=condition_r, K=condition_r.options
)
19  kde_r.fit(R, one_hot_encoded=groups_r)
20
21
22  # RECIPIENTS
23  bins_x = [30, 45, 60]
24
25  def condition_function_x(bilir):
26      return np.digitize(bilir, bins=bins_x).item()
27
28  condition_x = infer.Condition(
29      labels=['AGE'],

```

```

30         function=condition_function_x,
31         options=len(bins_x) + 1
32     )
33
34     kde_x = infer.KDEDensity(condition=condition_x, K=condition_x.options
35     )
36     kde_x.fit(X, one_hot_encoded=groups_x)
37
38     # BUILD THE SYSTEMS
39     resource_system, patient_system = dict(), dict()
40
41     def update_lam_0(t):
42         return (1 / (1+np.exp(-(t-450)/150))) * 3
43
44     def update_lam_1(t):
45         return (1 / (1+np.exp(-(t-350)/150))) * 2
46
47     def update_lam_2(t):
48         a = (1 / (1+np.exp(-(t-150)/150))) * 2
49         b = (1 / (1+np.exp(-(t-650)/100))) * 2
50         return (a + b)
51
52     def update_lam_3(t):
53         a = (1 / (1+np.exp(-(t-150)/150)))
54         b = (1 / (1+np.exp(-(t-650)/100)))
55         return (a + b)
56
57
58     resource_system[0] = infer.PoissonProcess(update_lam=update_lam_0)
59     resource_system[1] = infer.PoissonProcess(update_lam=update_lam_1)
60     resource_system[2] = infer.PoissonProcess(update_lam=update_lam_2)
61     resource_system[3] = infer.PoissonProcess(update_lam=update_lam_3)
62
63
64     patient_system[3] = infer.PoissonProcess(update_lam=update_lam_0)
65     patient_system[2] = infer.PoissonProcess(update_lam=update_lam_1)
66     patient_system[1] = infer.PoissonProcess(update_lam=update_lam_2)
67     patient_system[0] = infer.PoissonProcess(update_lam=update_lam_3)
68
69
70     resource_process = infer.PoissonSystem(
71         density=kde_r,
72         system=resource_system,
73         alpha=lambda t: 5,
74         normalize=True)
75
76     patient_process = infer.PoissonSystem(
77         density=kde_x,
78         system=patient_system,
79         alpha=lambda t: 7,
80         normalize=True)
81
82     organite.model.eval()
83
84     simulation = sim.Sim(
85         resource_system=resource_process,
86         patient_system=patient_process,
87         inference=organite
88     )
89
90     policy = MELD(
91         name='MELD', initial_waitlist=simulation._internal_waitlist, dm=
92         dm
93     )

```

```

93 df = simulation.simulate(policy, T=1021)
94

```

## D SOCIAL IMPACT

It is very clear that machine learning has the potential to transform healthcare. Its success both in other domains and already within healthcare is very promising. ML-based policies have the potential to extend lives. However, as with almost any other machine learning method, there are risks associated with their deployment in a real healthcare setting. Before any (experimental) ML-based policy (or even non-ML-based policies for that matter) are to be deployed, they require thorough testing.

We believe AllSim will enable practitioners to leverage their data and evaluate their policies in a rigorous manner. AllSim fully recognises the difficulties associated with evaluating policies that diverge from the data-generating policy and aims to mitigate these difficulties by employing tried and tested methods from causality. Naturally, there are some caveats: AllSim inherits the potential assumptions made by the counterfactual method, furthermore, if real data is used, it is crucial it is at least *somewhat* related to the environment the tested policy will end up operating in. If for example, one aims to evaluate a policy on a domain that is completely unrelated, AllSim’s learned simulation will provide the tested policy with unrealistic resources, recipients, and arrivals.

## E ALLSIM IN A VACCINE DISTRIBUTION SCENARIO

AllSim is a general purpose simulator which evaluates scarce resource allocation policies. While we mainly focus on organ-transplantation in our main text, we show in this section that AllSim is also applicable in other settings. To illustrate, we show how one can implement a vaccine distribution policy evaluation system in AllSim. This use-case will show how few adjustments one has to make with respect to the presented settings in our main text.

Compared to the organ-allocation problem, in vaccine distribution, each resource is the same and they arrive in batches. Furthermore, the type of patient-in-need is also much broader (in fact, they cover the entire population). Yet, AllSim is perfectly capable of modelling this scenario given the following:

- Batch arrival simply requires a multiplier. For example, if the Poisson process samples a value of 2 on one day, we could simply interpret this as two batches of 1000 doses.
- As all vaccines are the same, we no longer require a density of resources as we required for organ allocation. This can be done by implementing a dummy-density that always returns 1 (or the amount of vaccine).
- A broader patient-type in AllSim is achieved by retraining the density of recipients over the entire population.

These implementation details are relatively simple to implement and easily done using AllSim’s modular API.

While not necessarily a problem in vaccine distribution, recipient arrival in the ICU in a setting of infectious disease (such as COVID-19), is definitely different as compared to the organ-allocation setting. With organ-allocation, we can safely assume a Poisson process for recipient arrival as recipients enter the system independently. This is of course not true in an infectious disease scenario: one recipient arriving may indicate higher infection rate. As such, recipients *do not* arrive independently.

With the above, it is clear that we can no longer rely on a Poisson arrival process for recipients entering the system. Instead, to accurately model a situation of infectious disease, we recommend using a Hawkes process. To further illustrate, we include some code below showing exactly how one may go about including such a Hawkes process in AllSim.

```

1 class HawkesProcess(PoissonProcess):
2     def __init__(
3         self,
4         lam: float=.1,

```



```

5         update_lam: Callable[[int], float]=lambda t: t,
6         delta: float=.1,
7         a: float=.2
8     ):
9
10        assert a >= 0, "a should be larger than or equal to 0"
11        assert delta > 0, "delta should be larger than 0"
12
13        super().__init__(lam, update_lam)
14
15        self.a, self.delta = a, delta
16        self._samples = []
17
18        def get_lam_unnormalized(self, t: int) -> float:
19            return self._baseline_lam + np.sum(
20                self.a * self.beta * np.exp(-beta * (t - self._samples[
21                    self._samples < t])))
22
23        def progress(self, t: int, neu: float=1) -> int:
24            self.lam = neu * self.get_lam_unnormalized(t) # eqs. (5, 6)
25            sample = np.random.poisson(lam=self.lam)
26            self._samples.append(sample)
27            return sample

```

Naturally, if recipient arrival is indeed dependent on previous arrivals, simply learning the arrival process (as we have for figure 3) should model such a self-exciting process automatically. Furthermore, the above implementation is a simple linear univariate Hawkes process. We refer to `hawkeslib` (<https://github.com/canerturkmen/hawkeslib>) for implementations of more types of Hawkes processes.

## F COUNTERFACTUAL INFERENCE

AllSim relies for a large part on counterfactual inference. As real-world data is collected under an active policy, testing an alternative policy would almost immediately diverge from the allocations made in the data. As such, we have to *infer* an outcome from a pair made by the tested policy. If the tested policy is indeed different from the active policy, then we are unlikely to find a comparable pair in the data. The above is a question most considered in research on counterfactual inference [40].

Of course there are many models that perform counterfactual inference. As such, we provide a brief overview of the type of models one may resort to. Naturally, this list is non-exhaustive, but may guide a user to a model fit for their use-case.

Broadly speaking, we recognise a few "meta-categories", or *meta-learners* [49, 50]. The are as follows:

- **T-Learner.** Simplest is to learn a model (such as a neural net or random forest) for each treatment. In the vaccine distribution case that would mean learning a model on recipients who haven't received a vaccine, and a different model on recipients who have received a vaccine.
- **S-Learner.** Contrasting the above, an S-Learning learns one model, where the treatment is considered part of the covariate set. This allows for a more flexible treatment, such as continuous [51] or multivariate treatments [6]. In our main-text we use OrganITE as a counterfactual model [5], which can be considered an S-Learner.
- **X-Learner.** Used specifically for estimating the treatment effect directly, an X-Learner first learns the outcome functions (such as the T-Learner), then imputes the dataset with the completed treatment effect (or the estimated counterfactual outcome), and then learns the treatment effect with a third model directly on the completed samples. While useful for treatment effect estimating, performing counterfactual inference with an X-Learner would default back to either an S-Learner or T-Learner.
- **R-Learner.** An R-Learner, like the X-Learner, estimates the treatment effect directly [52]. Specifically, it learns the outcome functions as well as a propensity estimate. Using these

two models, the R-Learner optimises a custom loss function based on the propensity, the outcome model, and a cross-validation setup.

- **DR-Learner.** The DR-Learner or *doubly robust*-learner is an iteration of the X-Learner [53]. Like the X-Learner the DR-learner first estimates the outcome models, then completes the dataset to learn a treatment effects model using standard supervised learning. Then the DR-Learner repeats this process using the treatment effects model from the first step.

While there are more meta-learners than what we reported above (e.g. U-Learner [52] or CW-Learner [54]), but they are much less adopted and unlike the S-Learner and T-Learner not fit for estimating the counterfactual outcomes as they, like the X-Learner, R-Learner, and DR-Learner, fit the effect function directly. We point the interested reader to the following papers: [49, 50, 52]; or to the following open-source libraries for various implementations: `causal-ml` (<https://github.com/uber/causalml>), or `econml` (<https://github.com/microsoft/EconML>).
